1       **The rs6505162 C>A polymorphism in the**  
2               ***miRNA-423* gene exhibits a protective**  
3               **element of coronary artery in a southern**  
4       **Chinese population with Kawasaki disease**

5

6

7       Jiawen Li<sup>1,\*</sup>, Jinxin Wang<sup>1,\*</sup>, Xiaoping Su<sup>1</sup>, Zhiyong Jiang<sup>2</sup>, Xing Rong<sup>1</sup>, Xueping Gu<sup>2</sup>,  
8       Huixian Qiu<sup>1</sup>, Lanlan Zeng<sup>3</sup>, Hao Zheng<sup>3</sup>, Xiaoqiong Gu<sup>4,&</sup>, Maoping Chu<sup>1,&</sup>

9

10

11       <sup>1</sup>Children's Heart Center, Institute of Cardiovascular Development and Translational  
12       Medicine, the Second Affiliated Hospital and Yuying Children's Hospital, Wenzhou  
13       Medical University, Wenzhou, China;

14       <sup>2</sup>Department of Blood Transfusion and Clinical Lab, Guangzhou Institute of  
15       Pediatrics, Guangzhou Women and Children's Medical Center, Guangzhou Medical  
16       University, Guangzhou, Guangdong, China

17       <sup>3</sup>Department of Clinical Lab, Guangzhou Institute of Pediatrics, Guangzhou Women  
18       and Children's Medical Center, Guangzhou Medical University, Guangzhou,  
19       Guangdong, China

20       <sup>4</sup>Department of Blood Transfusion, Clinical Biological Resource Bank and Clinical  
21       Lab, Guangzhou Institute of Pediatrics, Guangzhou Women and Children's Medical  
22       Center, Guangzhou Medical University, Guangzhou, Guangdong, China

23       \*These authors contributed equally to this work

24

25

26       & **Correspondence to: Xiaoqiong Gu**, Department of Blood Transfusion, Clinical  
27       Biological Resource Bank and Clinical Lab, Guangzhou Institute of Pediatrics,  
28       Guangzhou Women and Children's Medical Center, Guangzhou Medical University,

29       Guangzhou 510623, Guangdong, China, Email: [guxiaoqiong@163.com](mailto:guxiaoqiong@163.com); **or**

30       **Maoping Chu**, Children's Heart Center, The Second Affiliated Hospital and Yuying  
31       Children's Hospital, Institute of Cardiovascular Development and Translational  
32       Medicine, Wenzhou Medical University, 109 West Xueyuan Road, Wenzhou 325027,  
33       Zhejiang, China, Email: [chmping@hotmail.com](mailto:chmping@hotmail.com).

34

35

## 36 Abstract

37 **Background:** Manifesting as acute rash, fever and vasculitis, belonging to autoimmune  
38 syndrome, Kawasaki disease(KD) is prone to occur in infants and young children. Males and  
39 females is affected by KD at a ratio of 1.4 to 1.7 : 1. KD is known to own many common clinical  
40 manifestations and complications, like coronary artery lesion(CAL) and coronary artery  
41 aneurysm(CAA). Polymorphisms of the rs6505162 locus in the *miRNA-423* gene are associated  
42 with enhance susceptibility to coronary artery disease and the alterations of the four cytokines  
43 IL-4, IL-10, IL-21, IL-22 in the early stages of diabetes. However, no researcher has reported  
44 whether rs6505162 is related to KD susceptibility or no. Therefore, we carried out the trial  
45 concentrating on the connection between *miRNA-423* rs6505162 C>A polymorphism and KD  
46 susceptibility.

47 **Methods:** To obtain the genotypes of rs6505162 in objects enrolled by 532 KD children and 623  
48 control, we applied Taqman real-time PCR and all statistical analyses was carried out by SAS.

49 **Results:** The comparison between all cases and all controls hinted that the rs6505162C>A  
50 polymorphism has no relationship with KD susceptibility. Nevertheless, a subgroup analysis  
51 revealed that the CA/AA genotypes of rs6505162 could reduce the occurrence of CAA (Adjusted  
52 age and gender odds ratio=1.30, 95%CI=1.02-1.67,  $P=0.037$ ) and CAL (Adjusted OR=1.56,  
53 95%CI=1.19-2.03,  $P=0.001$ ) in KD patients.

54 **Conclusion:** Our final results stated clearly that *miRNA-423* rs6505162 polymorphism appears  
55 to be a protective element of CAL and CAA in southern Chinese suffers with KD.

56

57 **Keywords:** *miRNA-423* rs6505162, Kawasaki disease, polymorphism, coronary  
58 artery lesion, coronary artery aneurysm

59

60 **Running head:** *miRNA-423* rs6505162 and Kawasaki disease

61

## 62 Introduction

63 In the year of 1967, the illness named Kawasaki disease(KD) was detected by Dr. Kawasaki.(1)  
64 Manifesting as acute rash, fever and vasculitis, belonging to autoimmune syndrome, Kawasaki  
65 disease(KD) which trigger acquired heart disease at most in non-developing countries is prone to  
66 occur in infants and young children.(2) In recent years, 18.4% suffers are subjected to coronary  
67 artery disease and 20-25% untreated sick children suffered from coronary artery dilatation. The  
68 phenomenon above-mentioned could give rise to myocardial ischemia, and some of them develop  
69 into coronary aneurysm which perhaps rupture, even gigantic coronary aneurysms.(3, 4) KD can  
70 occur at any age including adults and neonate.(5-7) In patients with KD, complications of  
71 coronary artery disease which Initial corticosteroid therapy can prevent are related to the duration  
72 of disease before treatment.(8) The incidence of KD in most international areas such as Korea

73 have been increasing slowly year by year, with a sex ratio of 1.4 to 1.7.(9-11)

74

75 The cause of KD is not totally clear and definite so far, and the exploration for the pathogen also  
76 has been upset.(12) According to the epidemiology and pathogenesis, the majority of human  
77 approve of the standpoint that the vasculitis of this illness is caused by the unsuitable immune  
78 reaction in individuals with hereditary susceptibility encountering one or more infectious  
79 irritants.(12, 13) In the culture of endothelial cells, somebody found that KLF4-miR-483 axis  
80 could be restrained by Kawasaki disease serum to speed up the development of  
81 Endothelial-to-Mesenchymal Transition(EndMT) which can injure vessel in KD patients.(14)  
82 Damage of endothelial cell homeostasis might concern the unusual circumstance of coronary  
83 artery in KD.(15) In a network analysis regarding protein interaction, the close contact between  
84 these genes concerning KD was verified to tell the pathogenesis of KD.(16) Several genes in the  
85 hypermethylated region were studied by Chen, and the correlation between the hypermethylated  
86 CpG locus and the pathogenesis of KD was mentioned for the first time. (17) These are some of  
87 the mechanisms of KD above.

88

89 Non-coding miRNAs, of which length are ~22 or so nucleotides, are produced by substances in  
90 the nucleus and cytoplasm and affect the course of genetics expression.(18) miRNA having a  
91 connection with plenty of mechanism and disease, include inflammatory response, severe asthma,  
92 diabetes mellitus, congenital heart disease, coronary artery disease(CHD). (19-23) Colorectal  
93 carcinoma whose potential biomarker might be *miR-423* rs6505162 has been studied by Jia, W.(24)  
94 Jha, Chandan K detected that The gene mutation in *microRNA-423* was in connection with  
95 enhance susceptibility to CHD.(25)The *miRNA-423* rs6505162 having a certain relationship  
96 with CHD in prognosis, as studied in this article, is associated with HDL.(26) However, the  
97 connection of the *miRNA-423* rs6505162 C>A polymorphism with KD susceptibility has not been  
98 investigated so far. On the foundation of the medical center we employing resources from 532 KD  
99 patients and 623 controls implemented a new case-control study to appraise the relationship  
100 between the *miRNA-423* rs6505162 C>A polymorphism and the risk of KD in Han children from  
101 southern China at the point.

102

103

## 104 **Materials and methods**

### 105 **Ethics declaration**

106 The present study satisfying the standard of the Declaration of Helsinki was implemented in  
107 Guangzhou Women and Children's Medical Center(2014073009), of which Review Committee  
108 acknowledged this study. And we ought to gather the written informed consent which legal  
109 guardians of participants endorsed.

110

### 111 **Study sample**

112 A majority of participators coming from southern China have been recruited in the trial. All of  
113 participants who were from January 2012 - January 2017 were Chinese Han with unrelated blood  
114 relationship. There were a plenty of samples that composed by 532 sufferers with recently  
115 diagnosed KD and 623 healthy controls in the research, according to the American Heart

116 Association (AHA) reference.(27) Each participant offered 2ml fresh blood, of which 200ul was  
117 extracted for genomic DNA, and the specimens remained were stored for further study.

118

### 119 **Extraction and genotyping in DNA**

120 On the basis of TIANGEN Company's specification, genomic DNA was abstracted from 200ul  
121 blood of each participant by making use of TIANamp Blood DNA Kit (Centrifugal column,  
122 TIANGEN). Positive and negative samples were put into 384-well plates, which could be  
123 beneficial to contrast. Taqman real-time PCR was applied to genotype the  
124 *miRNA-423*rs6505162by ABI Q6 (Applied Biosystems).

125

### 126 **Statistical analysis in subgroups**

127 In the group of the controls, genotype distributions that ought to be in line with the  
128 Hardy–Weinberg equilibrium were checked by a goodness-of-fit  $\chi^2$  test. The diversity of selective  
129 variables were tested by utilizing two-sided  $\chi^2$  test as well as frequency distributions of the  
130 genotype. By means of univariate logistic regression, the relationship between the *miRNA-423*  
131 rs6505162 C>A polymorphism and the susceptibility of KD was described by odds ratios(ORs)  
132 and 95% confidence intervals (CIs). The adjustment of multivariate analysis was calculated  
133 through gender and age. Connections between susceptibility of KD and the genotypes were deeply  
134 assessed by stratification, when data were divided into subgroups about age, gender, coronary  
135 lesion and coronary artery aneurysm. The groups mentioned above are based on American Heart  
136 Association (AHA) and can be concretely grouped according to coronary artery and age.(27,  
137 28)SAS software (version 9.4; SAS Institute, Cary, NC) in motion carried out all Statistical  
138 analyses quickly.

139

140

## 141 **Results**

### 142 **Population feature**

143 532 KD children and 623 healthy controls made up the participators in our research. The  
144 demographics entire participators possess were exhibited in the Table 1. 28.39 months was the  
145 average age of KD participators in onset. The quantity of 365(68.61%) in KD male patients was  
146 more than the one of 167(31.39%) in KD female patients. There was no distinct diversity in age  
147 ( $P=0.602$ ) or gender ( $P=0.143$ ) between KD children and healthy controls. There were 51(9.59%)  
148 patients with coronary artery aneurysm(CAA)when we took notice of the complications of KD. In  
149 addition, on the basis of coronary injury, 168(31.58%), 364(68.42%) cases were divided into CAL,  
150 NCAL, respectively.

151

### 152 **Connection between the *miRNA-423* rs6505162 C>A polymorphism and KD 153 susceptibility**

154 In the groups of KD children and controls, to probe the association between *miRNA-423*

155 rs6505162 C>A polymorphism and KD susceptibility, we analyzed the genotype frequency  
156 distributions. As illustrated in Table 2, the controls satisfied the elements for Hardy-Weinberg  
157 equilibrium ( $P=0.791$ ). The genotype frequency distributions of the *miRNA-423* rs6505162 C>A  
158 polymorphisms were 61.06% (CC), 34.97% (CA) and 3.97% (AA) in the KD group and 66.13%  
159 (CC), 30.50% (CA) and 3.37% (AA) in the controls. We observing the data from the rs6505162  
160 C>A polymorphism and KD susceptibility, no significant connections was detected.

161

## 162 Stratification analysis in subgroups

163 Stratifying by age, gender, coronary injury(CAL), and coronary artery aneurysm (CAA )which are  
164 closely related to KD ,we explored the connection between rs6505162 C>A polymorphism and  
165 KD susceptibility in a deeper level. In Table 3, there are two significant numbers we found. We  
166 noticed that the CA/AA genotypes of rs6505162 decreased the occurrence of CAA. (Adjusted  
167 OR=1.30, 95%CI=1.02-1.67,  $P=0.037$ ). The CA/AA genotypes of rs6505162 could also decrease  
168 the occurrence of CAL(Adjusted OR=1.56, 95%CI=1.19-2.03,  $P=0.001$ ). No other notable  
169 connections was detected, after we observed other subgroups such as gender and age.

170

## 171 Discussion

172 The nexus between KD susceptibility and the *miRNA-423* rs6505162 C>A polymorphism in our  
173 case-control investigation was further probed. No relevant association between the rs6505162  
174 C>A polymorphism and KD susceptibility was noticed in the sick (Table 2). Using the subgroup  
175 analysis, we pointed out that the *miRNA-423* rs6505162 CA/AA genotypes is one of protective  
176 factors of CAA and CAL in KD patients (Table 3). These can serve as a basis for studying other  
177 relevant matters. Nevertheless, no conclusion that CAA and CAL in KD patients might have  
178 certain connection with age and gender has been analyzed in our subgroup research. More samples  
179 from KD patients with various age groups ought to be gathered to verify this discovery.

180

181 *miRNA-423* rs6505162 polymorphisms in KD children is first referred in this study. According to  
182 many reports, *miRNA-423* is closely related to heart failure and can also be used as a  
183 corresponding indicator, such as BNP.(29-31) Other finding hinted that *miRNA-423* A allele and  
184 CA genotypes could enhance the risk of coronary artery disease(CAD).(25) Hakimzadeh reported  
185 that up-regulation of *miR423-5p* could identify the sick with low coronary collateral volume.(32)  
186 Alterations in the expression extent of 8 miRNAs including *miRNA-423* participating in the  
187 immune pathway might be involved in the immune process in the early stages of diabetes, through  
188 the alterations of the four cytokines IL-4, IL-10, IL-21, IL-22 and three pancreatic autoantibodies  
189 IA-2A, ICA, GAD65A.(33) In membranous glomerulonephropathy upregulation of *miRNA-423*  
190 had a certain significant association with down regulated IL6.(34)We found that the descending  
191 expression of the designated genes on proliferation and differentiation in myoblast was caused by  
192 the upregulated *miR-423-5p* suppressing the suppressor of fused homolog in expression.(35) In the  
193 polymorphism of *pre-MIR423* rs6505162, genetic mutations, C to A transition, inhibited the  
194 function of HEC-1b cell proliferation and migratory.(36) The abduction of EndMT progression  
195 accelerating cell proliferation and migratory capacity was caused by KD serum in endothelial cells,

196 which could be one of the pathogenesis in KD.(14) On the basis of the series of articles above,  
197 there is a clear connection between *miRNA-423* and coronary artery and coronary collateral. At the  
198 same time, *miRNA-423* is associated with a range of inflammatory factors. Manifesting vasculitis,  
199 belonging to autoimmune syndrome, KD refers to inflammatory disease. Finally, the pathway of  
200 EndMT can be used to explain that *miRNA-423* can be a protective factor of KD as well as the  
201 stability of coronary arteries.

202

203 Our nowadays research suggested that the *miRNA-423* rs6505162 C>A polymorphism might not  
204 act on the susceptibility to KD in a majority of Han in southern China. KD is known to have many  
205 familiar clinical manifestations and complications, such as CAL and CAA.(3) We also noted that  
206 the CA/AA genotypes of rs6505162 reduced the occurrence of CAA and CAL in KD children.  
207 Nevertheless, our discovery including two positive point is required to affirm by more evidences  
208 owing to various factors restricting our study.

209

210

## 211 **Acknowledgements**

212 Thanks to all the clinical samples belonging to Clinical Biological Resource Bank of Guangzhou  
213 Women and Children's Medical Center, we can succeed in the trial. We thank An-qi Zhang for  
214 providing her technical guidance.

215

216

## 217 **Funding**

218 This research was agreed by grants from the Guangdong Natural Science Fund, China (fund  
219 number 2016A030313836), the Guangdong Science and Technology Project, China (fund  
220 numbers 2014A020212023, 2014A020212613 and 2014A020212012), the Guangzhou Science  
221 and Technology Program Project, China (fund numbers 201804010035, 201707010270,  
222 201607010011 and 201510010159), the Guangzhou Medical and Health Technology Projects,  
223 China (fund numbers 20171A011260 and 20161A010030), and the National Key Basic Research  
224 and Development Program (973 Program), China (fund number 2015CB755402)

225

226

## 227 **Conflicts of interest**

228 No conflicts of interest have been declared so far.

229

230

## 231 **References**

- 232 1. Kawasaki T. [Acute febrile mucocutaneous syndrome with lymphoid involvement with specific  
233 desquamation of the fingers and toes in children]. *Arerugi = [Allergy]* 1967; 16: 178-222.
- 234 2. McCrindle BW, Rowley AH, Newburger JW et al. Diagnosis, Treatment, and Long-Term  
235 Management of Kawasaki Disease: A Scientific Statement for Health Professionals From the American  
236 Heart Association. *Circulation* 2017; 135: e927-e999.
- 237 3. Newburger JW, Takahashi M, Burns JC. Kawasaki Disease. *Journal of the American College of*  
238 *Cardiology* 2016; 67: 1738-1749.
- 239 4. Bozorgi A, Shahrzad M, Karbalaee Saleh S. Gigantic coronary aneurysms: a late complication of  
240 Kawasaki disease. *Kardiologia polska* 2014; 72: 989.
- 241 5. Fraison JB, Seve P, Dauphin C et al. Kawasaki disease in adults: Observations in France and  
242 literature review. *Autoimmunity reviews* 2016; 15: 242-249.
- 243 6. Altammar F, Lang B. Kawasaki Disease in the neonate: case report and literature review. *Pediatric*  
244 *rheumatology online journal* 2018; 16: 43.
- 245 7. Sanlidag B, Balkan C, Bahceciler N. A case report: incomplete Kawasaki disease in a  
246 hypogammaglobulinemie child. *Archivos argentinos de pediatria* 2018; 116: e322-e324.
- 247 8. Chen S, Dong Y, Kiuchi MG et al. Coronary Artery Complication in Kawasaki Disease and the  
248 Importance of Early Intervention : A Systematic Review and Meta-analysis. *JAMA pediatrics* 2016; 170:  
249 1156-1163.
- 250 9. Cimaz R, Fanti E, Mauro A et al. Epidemiology of Kawasaki disease in Italy: surveillance from  
251 national hospitalization records. *European journal of pediatrics* 2017; 176: 1061-1065.
- 252 10. Ha S, Seo GH, Kim KY et al. Epidemiologic Study on Kawasaki Disease in Korea, 2007-2014: Based  
253 on Health Insurance Review & Assessment Service Claims. *Journal of Korean medical science* 2016; 31:  
254 1445-1449.
- 255 11. Saundankar J, Yim D, Itotoh B et al. The epidemiology and clinical features of Kawasaki disease in  
256 Australia. *Pediatrics* 2014; 133: e1009-1014.
- 257 12. Yim D, Curtis N, Cheung M et al. Update on Kawasaki disease: epidemiology, aetiology and  
258 pathogenesis. *Journal of paediatrics and child health* 2013; 49: 704-708.
- 259 13. Takahashi K, Oharaseki T, Yokouchi Y. Pathogenesis of Kawasaki disease. *Clinical and experimental*  
260 *immunology* 2011; 164 Suppl 1: 20-22.
- 261 14. He M, Chen Z, Martin M et al. miR-483 Targeting of CTGF Suppresses  
262 Endothelial-to-Mesenchymal Transition: Therapeutic Implications in Kawasaki Disease. *Circulation*  
263 *research* 2017; 120: 354-365.
- 264 15. Ueno K, Ninomiya Y, Hazeki D et al. Disruption of Endothelial Cell Homeostasis Plays a Key Role in  
265 the Early Pathogenesis of Coronary Artery Abnormalities in Kawasaki Disease. *Scientific reports* 2017;  
266 7: 43719.
- 267 16. Lv YW, Wang J, Sun L et al. Understanding the pathogenesis of Kawasaki disease by network and  
268 pathway analysis. *Computational and mathematical methods in medicine* 2013; 2013: 989307.
- 269 17. Chen KD, Huang YH, Ming-Huey Guo M et al. The human blood DNA methylome identifies crucial  
270 role of beta-catenin in the pathogenesis of Kawasaki disease. *Oncotarget* 2018; 9: 28337-28350.

- 271 18. Achour C, Bogard B, Hube F et al. The Non-Coding RNA Journal Club: Highlights on Recent  
272 Papers-5. *Non-coding RNA* 2017: 3.
- 273 19. Borghini A, Andreassi MG. Genetic polymorphisms offer insight into the causal role of microRNA  
274 in coronary artery disease. *Atherosclerosis* 2018; 269: 63-70.
- 275 20. Chen Y, Mao ZD, Shi YJ et al. Comprehensive analysis of miRNA-mRNA-lncRNA networks in severe  
276 asthma. *Epigenomics* 2019; 11: 115-131.
- 277 21. Gao X, Yang L, Luo H et al. A Rare Rs139365823 Polymorphism in Pre-miR-138 Is Associated with  
278 Risk of Congenital Heart Disease in a Chinese Population. *DNA and cell biology* 2018; 37: 109-116.
- 279 22. Hashimoto N, Tanaka T. Role of miRNAs in the pathogenesis and susceptibility of diabetes  
280 mellitus. *Journal of human genetics* 2017; 62: 141-150.
- 281 23. Wang Z, Wang P, Wang Z et al. MiRNA-548c-5p downregulates inflammatory response in  
282 preeclampsia via targeting PTPRO. *Journal of cellular physiology* 2018.
- 283 24. Jia W, Zeng L, Luo S et al. Association of microRNA-423 rs6505162 C>A polymorphism with  
284 susceptibility and metastasis of colorectal carcinoma. *Medicine* 2018; 97: e9846.
- 285 25. Jha CK, Mir R, Elfaki I et al. Potential Impact of MicroRNA-423 Gene Variability in Coronary Artery  
286 Disease. *Endocrine, metabolic & immune disorders drug targets* 2019; 19: 67-74.
- 287 26. Li Q, Chen L, Chen D et al. Influence of microRNA-related polymorphisms on clinical outcomes in  
288 coronary artery disease. *American journal of translational research* 2015; 7: 393-400.
- 289 27. Newburger JW, Takahashi M, Gerber MA et al. Diagnosis, treatment, and long-term management  
290 of Kawasaki disease: a statement for health professionals from the Committee on Rheumatic Fever,  
291 Endocarditis and Kawasaki Disease, Council on Cardiovascular Disease in the Young, American Heart  
292 Association. *Circulation* 2004; 110: 2747-2771.
- 293 28. Che D, Li J, Fu L et al. The rs1625579 T>G polymorphism in the miRNA-13 gene confers a risk of  
294 early-onset Kawasaki disease in a southern Chinese population. *Infection and drug resistance* 2018;  
295 11: 1055-1060.
- 296 29. Schneider S, Silvello D, Martinelli NC et al. Plasma levels of microRNA-21, -126 and -423-5p alter  
297 during clinical improvement and are associated with the prognosis of acute heart failure. *Molecular  
298 medicine reports* 2018; 17: 4736-4746.
- 299 30. Yan H, Ma F, Zhang Y et al. miRNAs as biomarkers for diagnosis of heart failure: A systematic  
300 review and meta-analysis. *Medicine* 2017; 96: e6825.
- 301 31. Tijssen AJ, Creemers EE, Moerland PD et al. MiR423-5p as a circulating biomarker for heart failure.  
302 *Circulation research* 2010; 106: 1035-1039.
- 303 32. Hakimzadeh N, Nossent AY, van der Laan AM et al. Circulating MicroRNAs Characterizing Patients  
304 with Insufficient Coronary Collateral Artery Function. *PloS one* 2015; 10: e0137035.
- 305 33. Samandari N, Mirza AH, Kaur S et al. Influence of Disease Duration on Circulating Levels of  
306 miRNAs in Children and Adolescents with New Onset Type 1 Diabetes. *Non-coding RNA* 2018; 4.
- 307 34. Barbagallo C, Passanisi R, Mirabella F et al. Upregulated microRNAs in membranous  
308 glomerulonephropathy are associated with significant downregulation of IL6 and MYC mRNAs. *Journal  
309 of cellular physiology* 2018.
- 310 35. Ge J, Zhu J, Xia B et al. miR-423-5p inhibits myoblast proliferation and differentiation by targeting  
311 Sufu. *Journal of cellular biochemistry* 2018; 119: 7610-7620.
- 312 36. Su X, Hu Y, Li Y et al. The polymorphism of rs6505162 in the MIR423 coding region and recurrent  
313 pregnancy loss. *Reproduction* 2015; 150: 65-76.
- 314



**Table 1: Frequency distribution of selected variables for cases and controls.**

| Variables                | Cases (n=532) |       | Controls (n=623) |       | <i>P</i> <sup>a</sup> |
|--------------------------|---------------|-------|------------------|-------|-----------------------|
|                          | No.           | %     | No.              | %     |                       |
| Age range, month         | 1.00-166.0    |       | 0.07-166         |       | 0.602                 |
| Mean ± SD                | 28.39 ± 24.68 |       | 28.48 ± 25.33    |       |                       |
| <12                      | 137           | 25.75 | 165              | 26.48 |                       |
| 12-60                    | 351           | 65.98 | 397              | 63.72 |                       |
| >60                      | 44            | 8.27  | 61               | 9.79  |                       |
| Gender                   |               |       |                  |       | 0.143                 |
| Female                   | 167           | 31.39 | 221              | 35.47 |                       |
| Male                     | 365           | 68.61 | 402              | 64.53 |                       |
| Coronary artery aneurysm |               |       |                  |       |                       |
| CAA                      | 51            | 9.59  |                  |       |                       |
| NCAA                     | 481           | 90.41 |                  |       |                       |
| Coronary artery lesion   |               |       |                  |       |                       |
| CAL                      | 168           | 31.58 |                  |       |                       |
| NCAL                     | 364           | 68.42 |                  |       |                       |

<sup>a</sup> Two-sided  $\chi^2$  test for distributions between cases and controls.

Abbreviations: CAA, coronary artery aneurysm; CAL, coronary artery lesion; NCAA, patients without CAA; NCAL, patients without CAL.

**Table 2. Genotype distributions of rs6505162 C>A polymorphism and Kawasaki disease susceptibility**

| <b>Genotype</b> | <b>Cases<br/>(N=529)</b> | <b>Controls<br/>(N=623)</b> | <b><i>P</i><sup>a</sup></b> | <b>Crude OR<br/>(95% CI)</b> | <b><i>P</i></b> | <b>Adjusted OR<br/>(95% CI)<sup>b</sup></b> | <b><i>P</i><sup>b</sup></b> |
|-----------------|--------------------------|-----------------------------|-----------------------------|------------------------------|-----------------|---------------------------------------------|-----------------------------|
| CC              | 323 (61.06)              | 412 (66.13)                 |                             | 1.00                         |                 | 1.00                                        |                             |
| CA              | 185 (34.97)              | 190 (30.50)                 |                             | 1.25 (0.98-1.61)             | 0.075           | 1.25 (0.97-1.60)                            | 0.085                       |
| AA              | 21 (3.97)                | 21 (3.37)                   |                             | 1.29 (0.69-2.40)             | 0.425           | 1.28 (0.69-2.38)                            | 0.443                       |
| Additive        |                          |                             | 0.202                       | 1.20 (0.97-1.48)             | 0.087           | 1.20 (0.98-1.48)                            | 0.084                       |
| Dominant        | 206 (38.94)              | 211 (33.87)                 | 0.074                       | 1.25 (0.98-1.59)             | 0.074           | 1.25 (0.98-1.59)                            | 0.071                       |
| Recessive       | 508 (96.03)              | 602 (96.63)                 | 0.688                       | 1.19 (0.64-2.20)             | 0.588           | 1.18 (0.64-2.20)                            | 0.591                       |

<sup>a</sup>  $\chi^2$  test for genotype distributions between Kawasaki disease patients and controls

<sup>b</sup> Adjusted for age and gender

Abbreviations: HWE, Hardy – Weinberg equation; KD, Kawasaki disease; OR, odds ratio.

**Table 3. Stratification analysis for the association between rs6505162 C>A polymorphism and Kawasaki disease susceptibility**

| Variables                | CC<br>cases/controls | CA/AA   | Crude OR<br>(95% CI)    | <i>P</i>     | Adjusted OR <sup>a</sup><br>(95% CI) | <i>P</i> <sup>a</sup> |
|--------------------------|----------------------|---------|-------------------------|--------------|--------------------------------------|-----------------------|
| Age, month               |                      |         |                         |              |                                      |                       |
| <12                      | 84/107               | 52/58   | 1.14 (0.71-1.83)        | 0.580        | 1.11 (0.69-1.78)                     | 0.673                 |
| 12-60                    | 212/263              | 137/134 | 1.27 (0.94-1.71)        | 0.119        | 1.28 (0.95-1.72)                     | 0.111                 |
| >60                      | 27/42                | 17/19   | 1.39 (0.62-3.14)        | 0.426        | 1.32 (0.57-3.07)                     | 0.514                 |
| Gender                   |                      |         |                         |              |                                      |                       |
| Females                  | 96/148               | 71/73   | 1.50 (0.99-2.27)        | 0.056        | 1.46 (0.96-2.22)                     | 0.081                 |
| Males                    | 227/264              | 135/138 | 1.14 (0.85-1.53)        | 0.393        | 1.13 (0.84-1.52)                     | 0.425                 |
| Coronary artery aneurysm |                      |         |                         |              |                                      |                       |
| CAA                      | 36/412               | 15/211  | 0.81 (0.44-1.52)        | 0.518        | 0.82 (0.44-1.53)                     | 0.529                 |
| NCAA                     | 287/412              | 191/211 | <b>1.30 (1.02-1.66)</b> | <b>0.038</b> | <b>1.30 (1.02-1.67)</b>              | <b>0.037</b>          |
| Coronary artery lesion   |                      |         |                         |              |                                      |                       |
| CAL                      | 122/412              | 46/211  | 0.74 (0.51-1.07)        | 0.112        | 0.74 (0.50-1.07)                     | 0.112                 |
| NCAL                     | 201/412              | 160/211 | <b>1.55 (1.19-2.03)</b> | <b>0.001</b> | <b>1.56 (1.19-2.03)</b>              | <b>0.001</b>          |

<sup>a</sup> Adjusted for age and gender. Statistically significant values are exhibited in bold ( $P < 0.05$ ).

Abbreviations: CAA, coronary artery aneurysm; CAL, coronary artery lesion; KD, Kawasaki disease; NCAA, patients without CAA; NCAL, patients without CAL; OR, odds ratio.
